# Supplementary material for: Synthesis, Characterization, Cytotoxicity, Cellular Imaging, Molecular Docking, and ADMET Studies of Piperazine-Linked 1,8-Naphthalimide-Arylsulfonyl Derivatives
Source: MDPI journal article supplement (doi:10.3390/ijms25021069), 2024-01-15
Supplement: s1 [file s1]

# Synthesis, Characterization, Cytotoxicity, Cellular Imaging, Molecular Docking, and ADMET Studies of Piperazine-Linked 1,8-Naphthalimide-Arylsulfonyl Derivatives

Ashanul Haque <sup>1,2</sup>, Khalaf M. Alenezi <sup>1,2</sup>, Ahmed Al-Otaibi <sup>1,2</sup>,  
Abdulmohsen Khalaf Dhahi Alsukaibi <sup>1,2</sup>, Ataur Rahman <sup>3</sup>, Ming-Fa Hsieh <sup>4,\*</sup>,  
Mei-Wen Tseng <sup>4</sup> and Wai-Yeung Wong <sup>5,\*</sup>

<sup>1</sup> Department of Chemistry, College of Science, University of Ha'il, Ha'il 81451, Saudi Arabia

<sup>2</sup> Medical and Diagnostic Research Centre, University of Ha'il, Ha'il 55473, Saudi Arabia

<sup>3</sup> Jamia Senior Secondary School, Jamia Millia Islamia, New Delhi 110025, India

<sup>4</sup> Department of Biomedical Engineering, Chung Yuan Christian University, 200 Chung Pei Road, Chung Li District, Taoyuan City 32023, Taiwan

<sup>5</sup> Department of Applied Biology and Chemical Technology, The Hong Kong Polytechnic University, Hung Hom, Kowloon, Hong Kong, China

\* Correspondence: mfhsieh@cycu.edu.tw (M.-F.H.); wai-yeung.wong@polyu.edu.hk (W.-Y.W.)

## Supporting Information



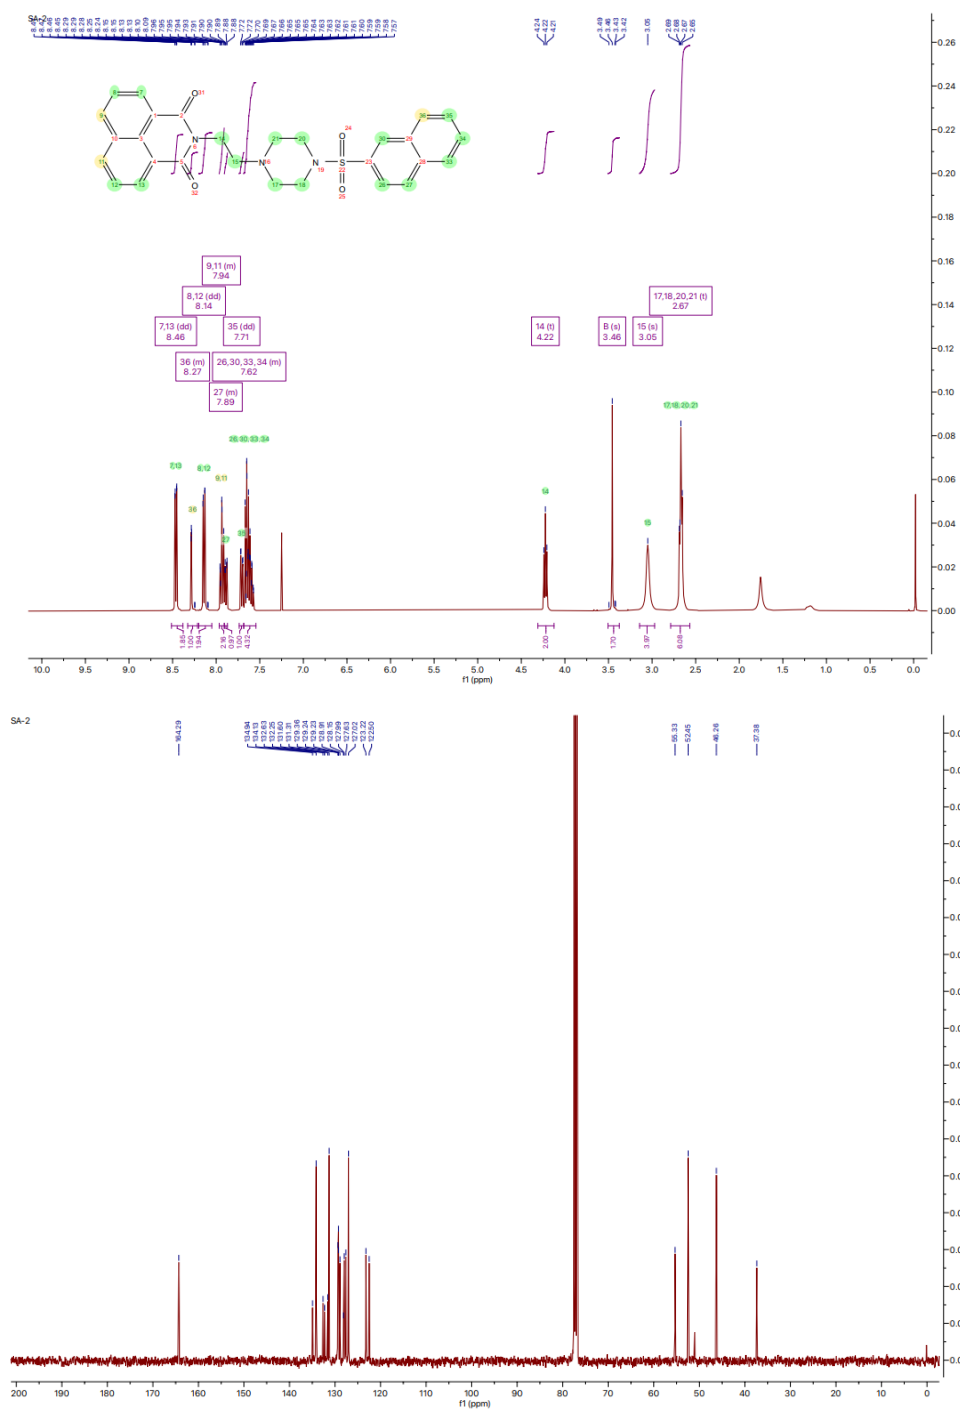

**Figure S2:** <sup>1</sup>H- and <sup>13</sup>C-NMR spectra of compound (SA2).

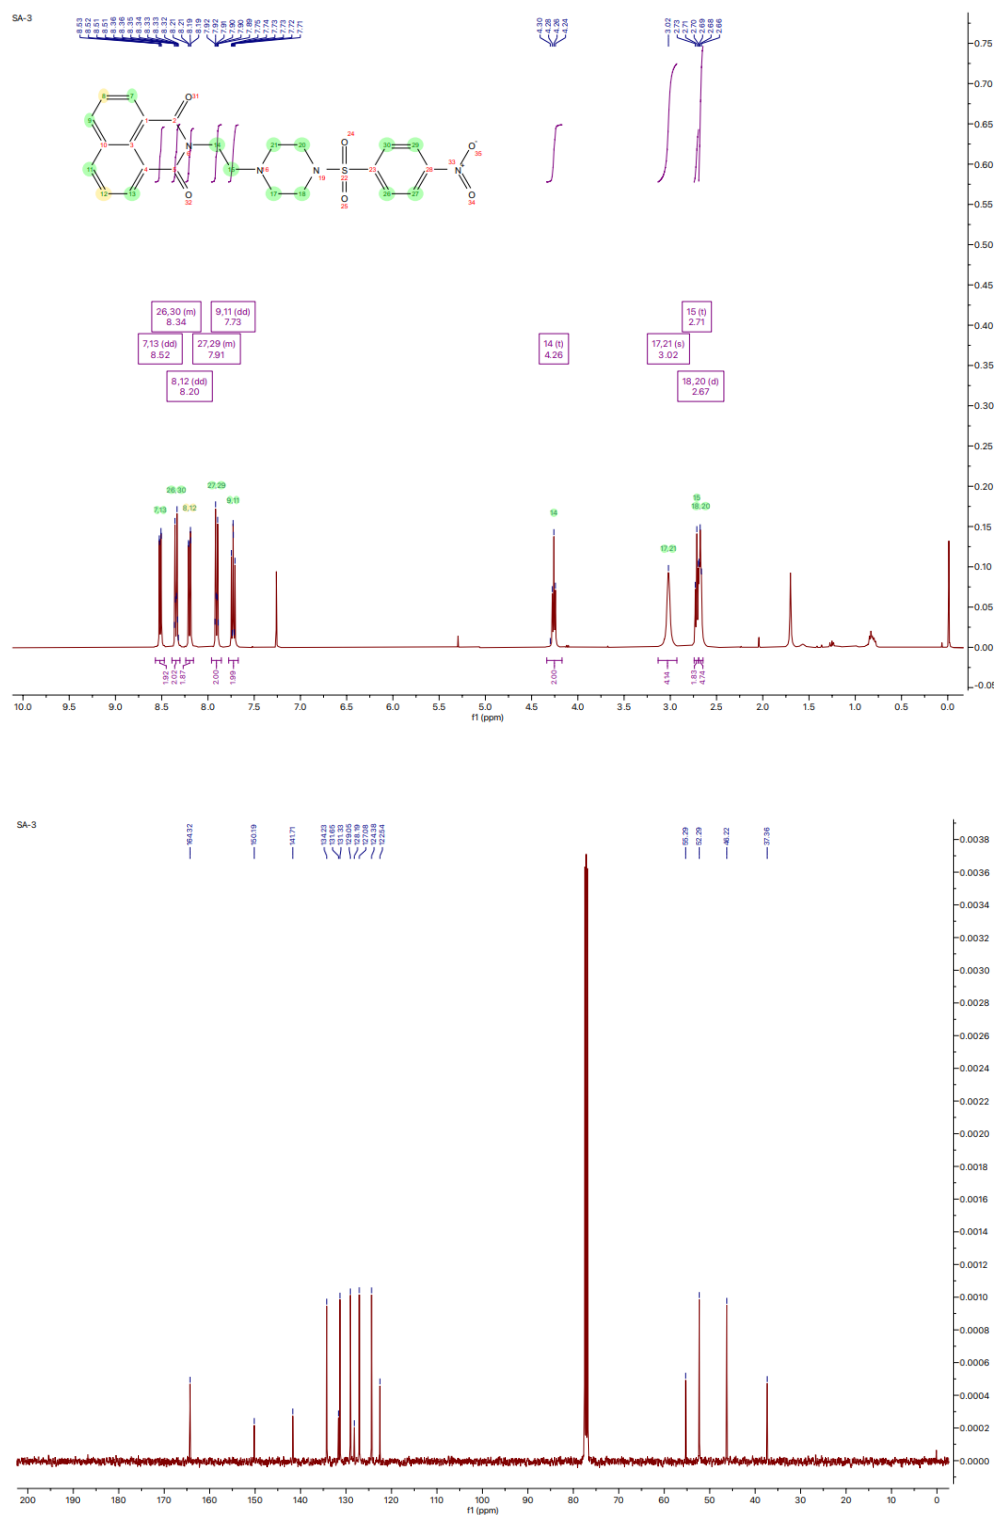

Figure S3:  $^1\text{H}$ - and  $^{13}\text{C}$ -NMR spectra of compound (SA3).

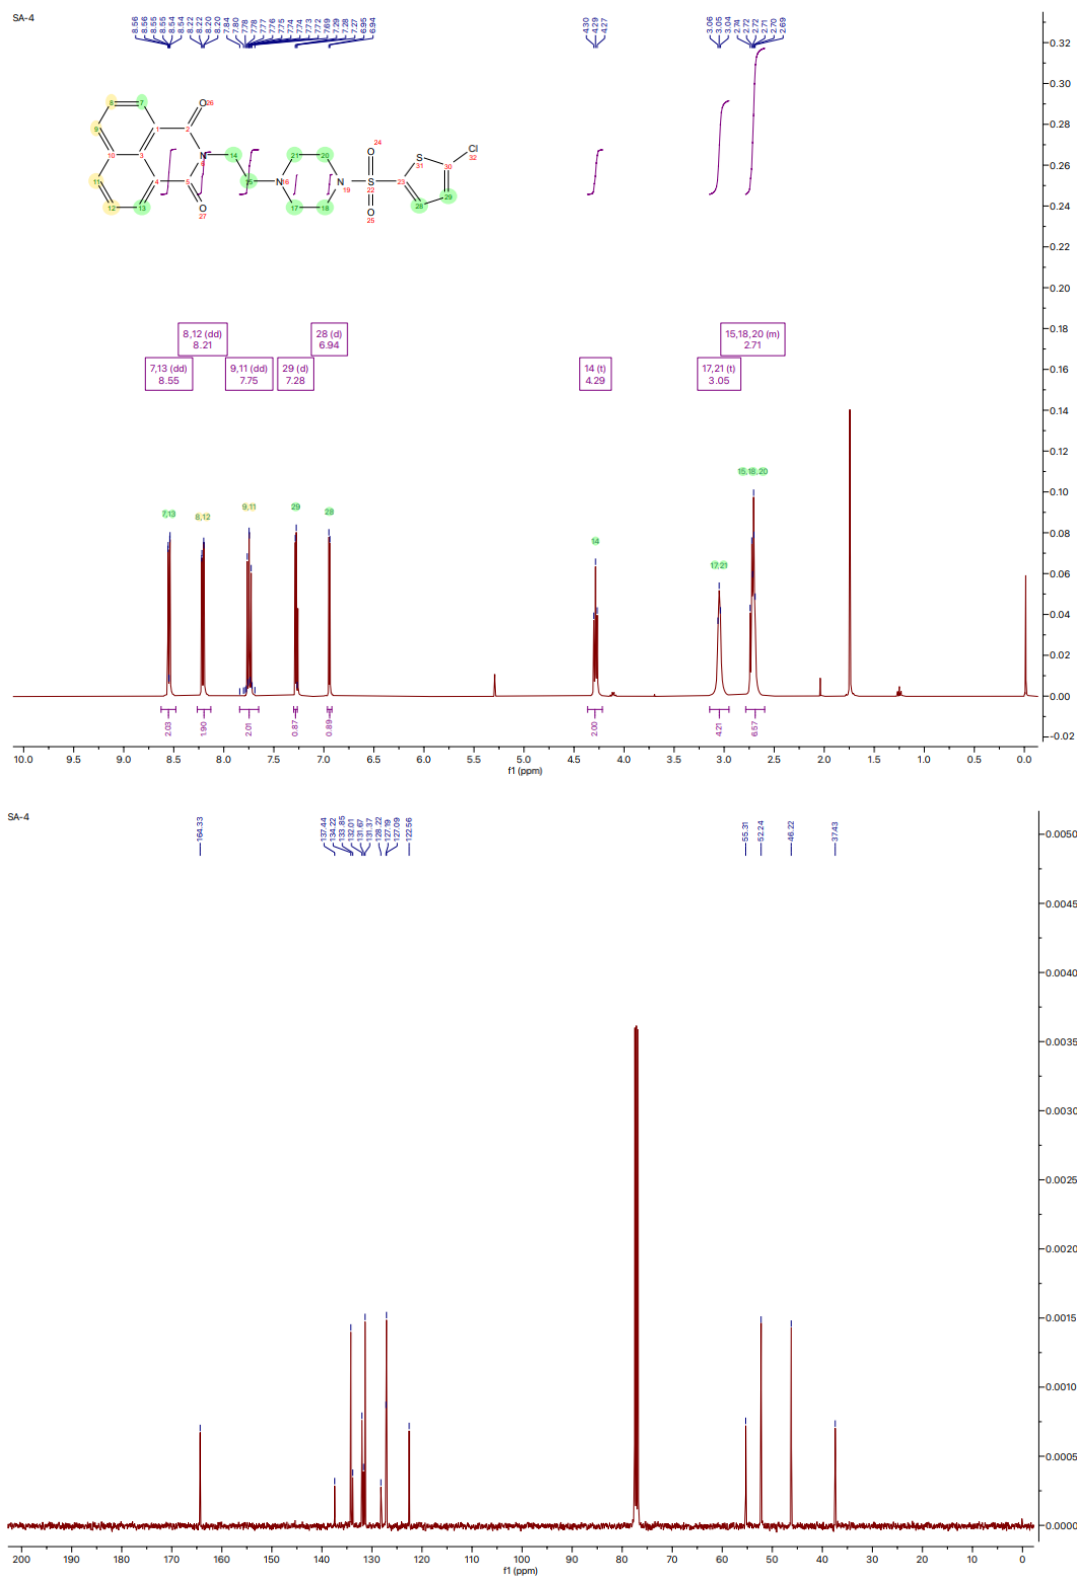

Figure S4: <sup>1</sup>H- and <sup>13</sup>C-NMR spectra of compound (SA4).

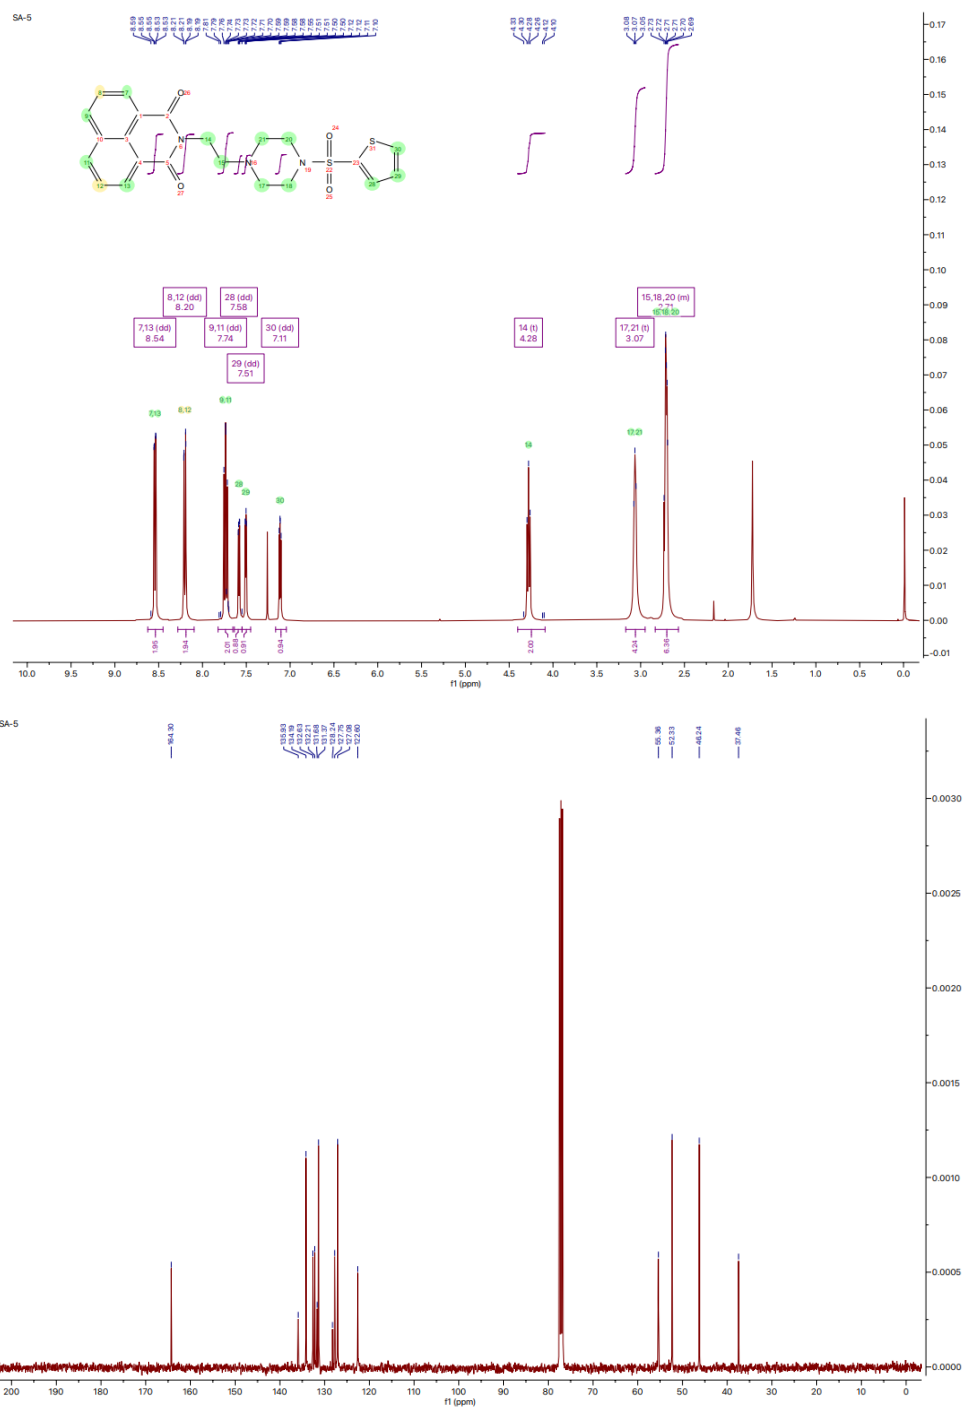

Figure S5:  $^1\text{H}$ - and  $^{13}\text{C}$ -NMR spectra of compound (SA5).

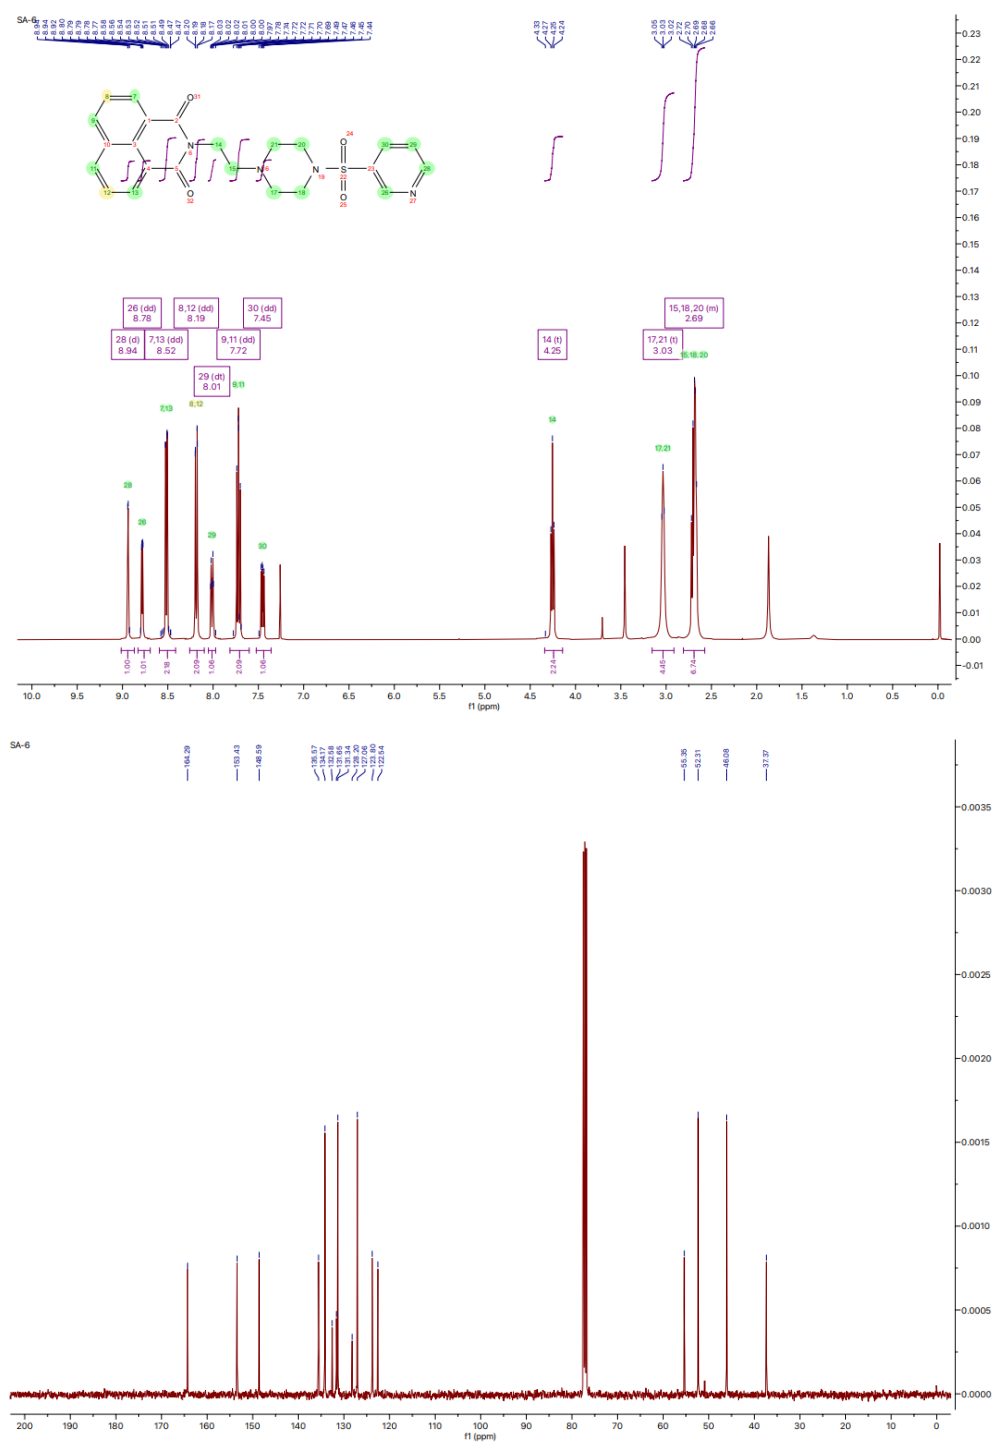

Figure S6: <sup>1</sup>H- and <sup>13</sup>C-NMR spectra of compound (SA6).





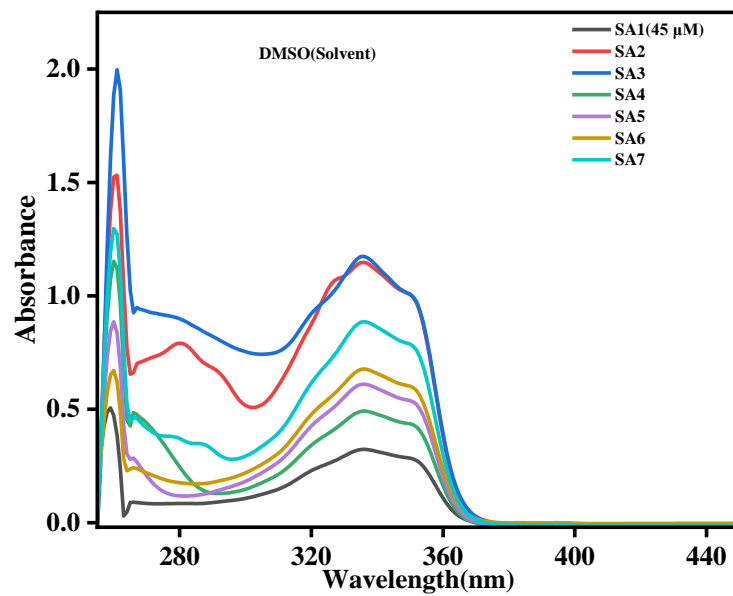

**Figure S8:** Absorption spectra of SA1-SA7 in DMSO at RT.

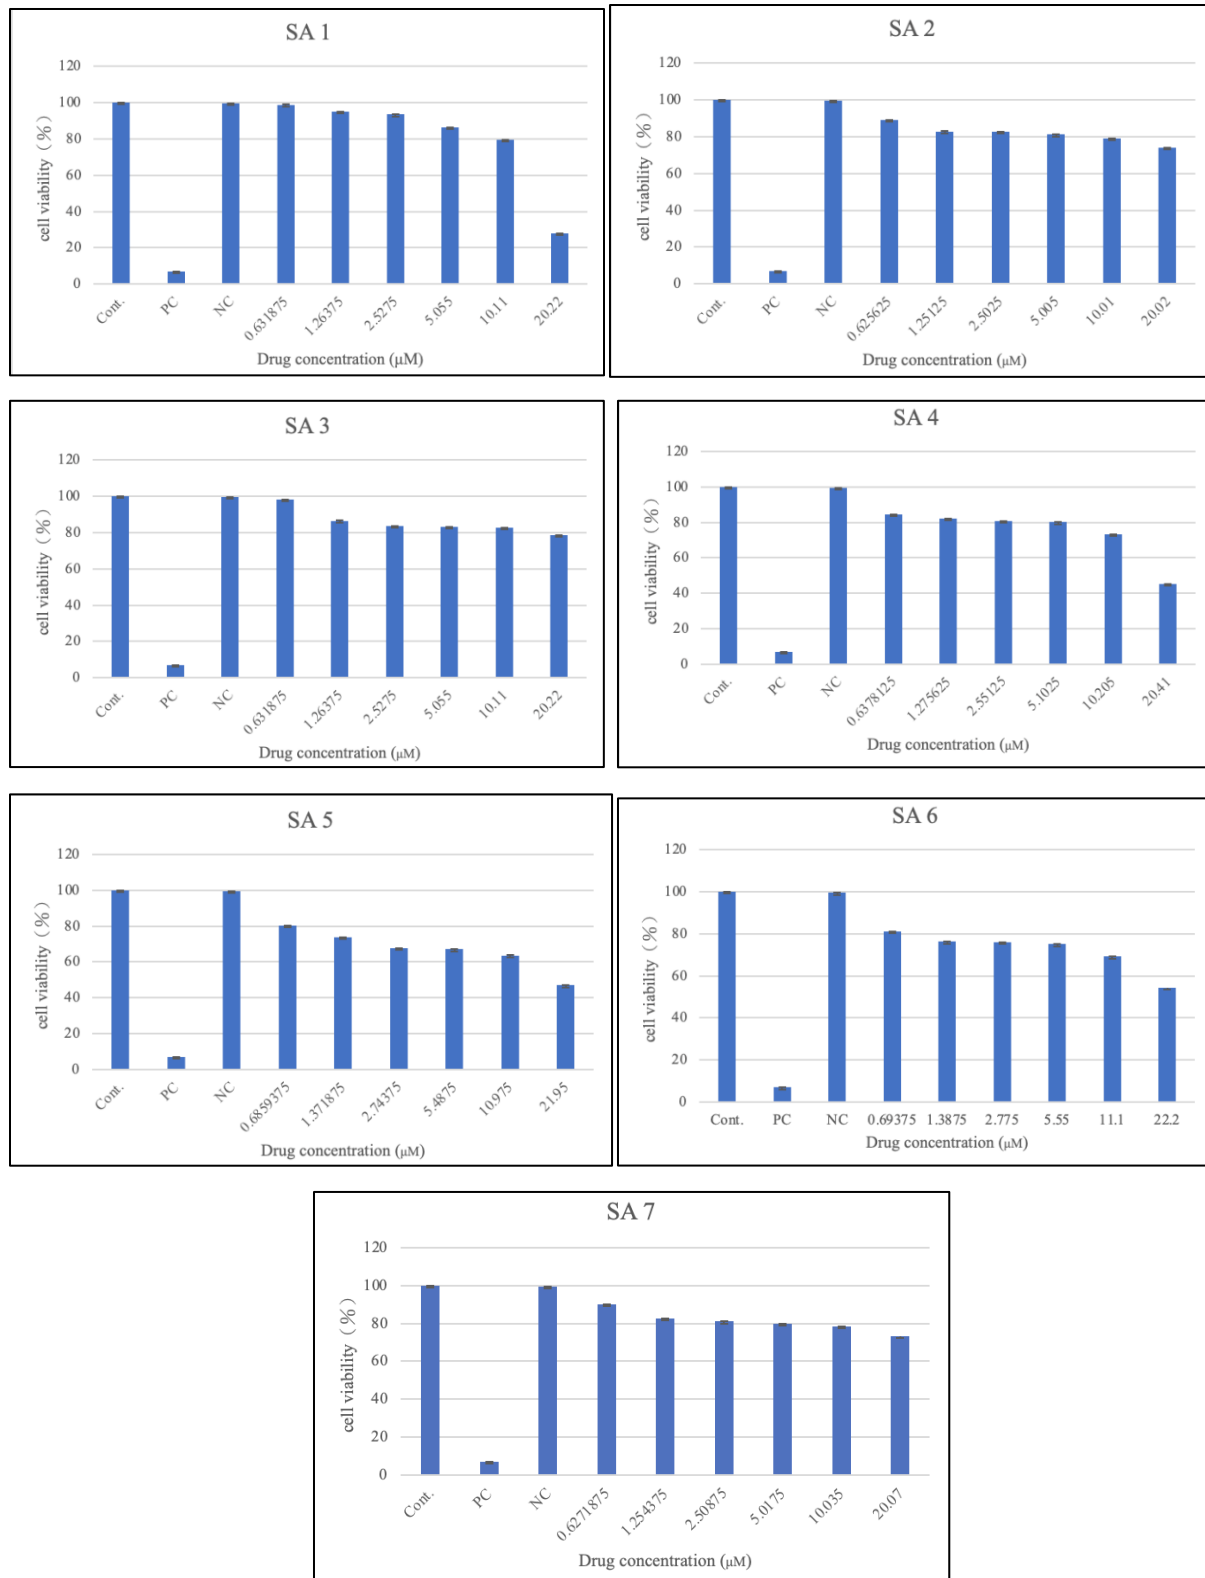

**Figure S9:** % Cell viability of the SA1-SA7 against mouse breast cancer 4T1 cell line.

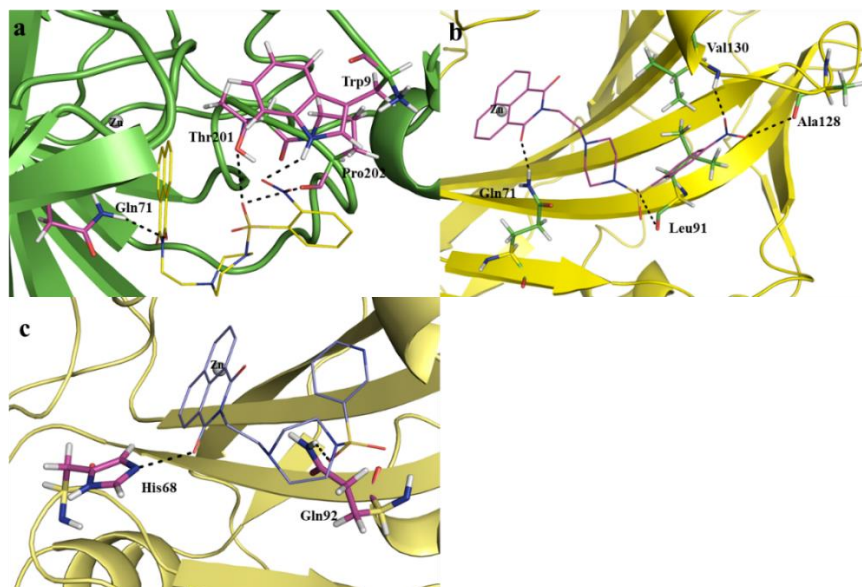

**Figure S10:** Docking results showing the binding residues of CAIX protein with compounds SA1, SA3, and SA6 (denoted as a-c, respectively). H-bonds are shown in black dotted lines.

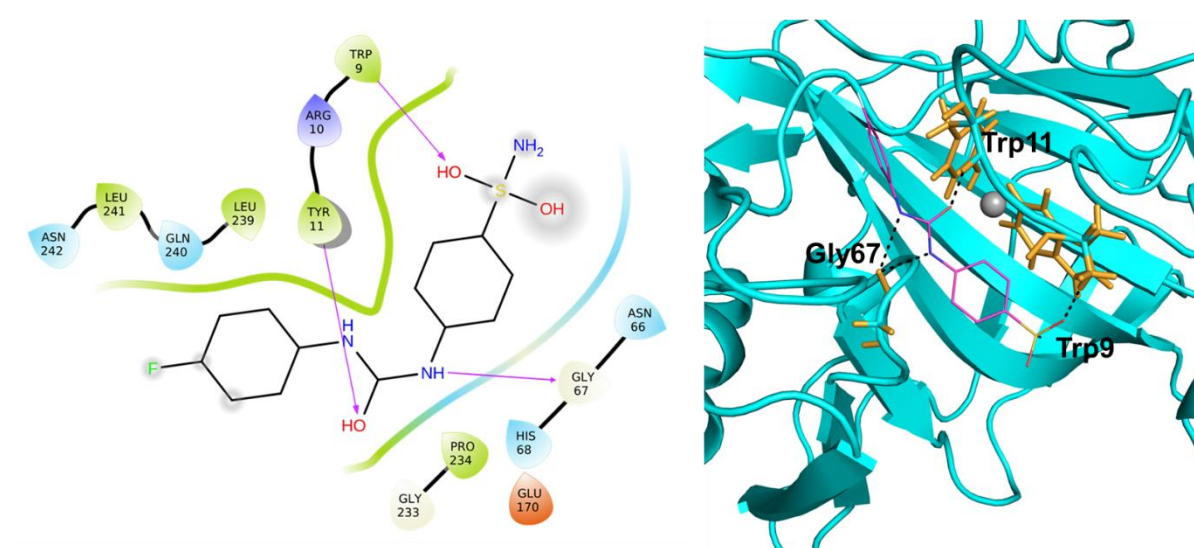

**Figure S11:** Docking results showing the binding residues of CAIX protein with inhibitor SLC-0111 (4-(3-(4-fluorophenyl)ureido)benzenesulfonamide).

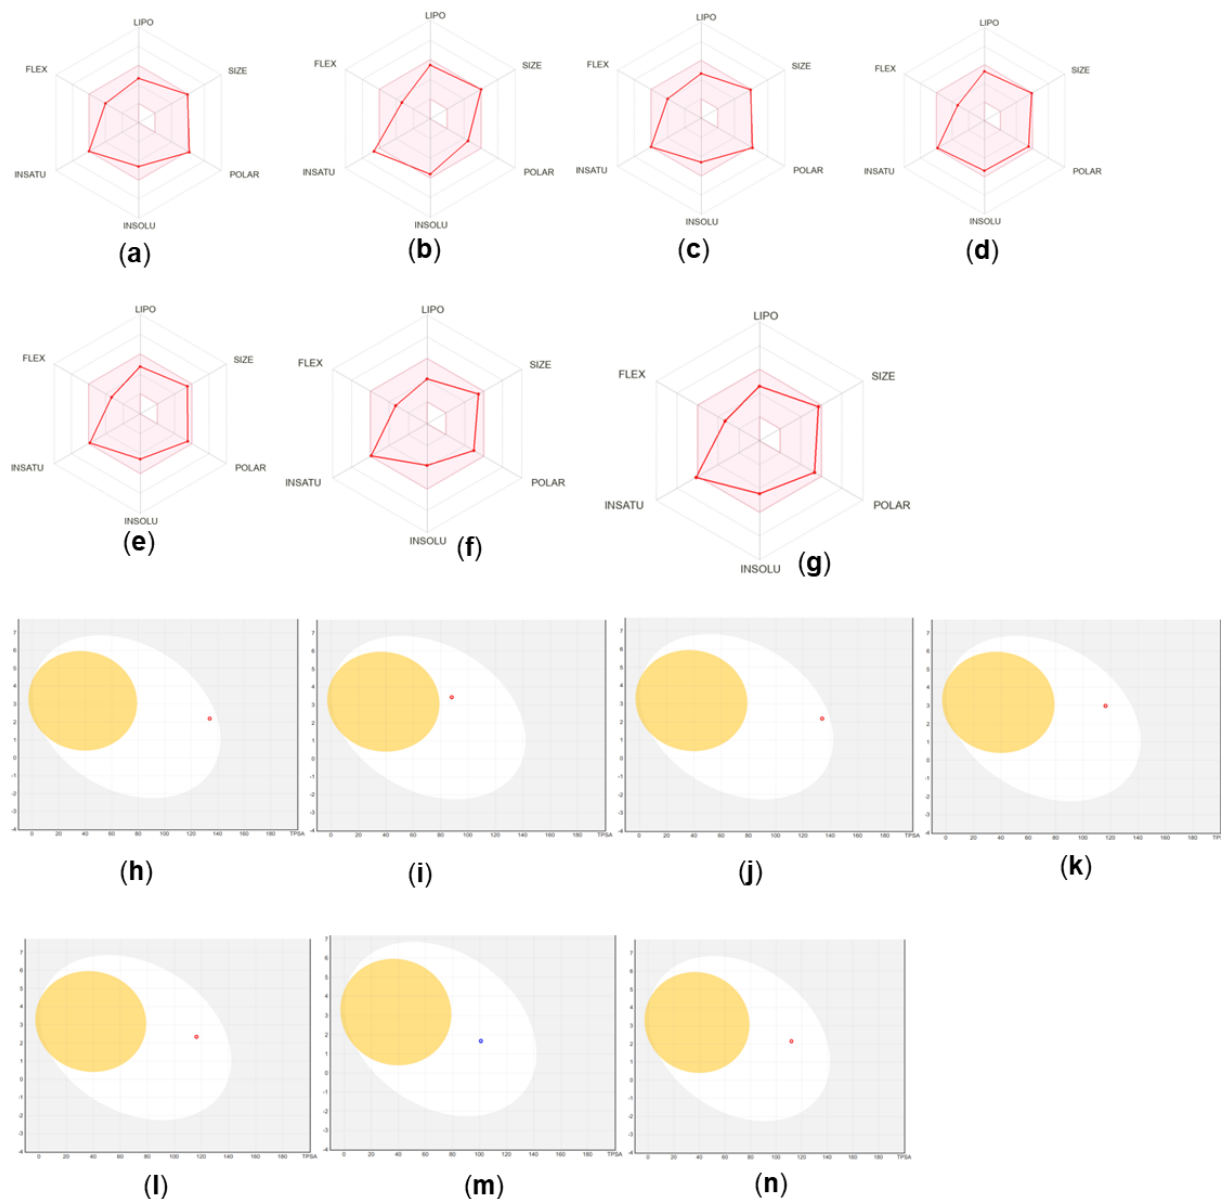

**Figure S12:** Predicted radar plots (a-g) and BOILED-Egg diagram (h-n) of compounds (SA1-SA7). Plots were obtained using the SwissADME web tool. Typical values for a molecule to fall the pink area are as follows: lipophilicity =  $-0.7$  to  $+5.0$ ; size:  $150 \text{ g/mol} < \text{molecular weight} < 500 \text{ g/mol}$ ; polarity:  $20 \text{ \AA}^2 < \text{topological polar surface area (TPSA)} < 130 \text{ \AA}^2$ ; insolubility:  $0 < \text{LogS} < 6$ ; and INSATU (insaturation):  $0.25 < \text{fraction of carbons in } sp^3 \text{ hybridization} < 1$ ; and flexibility:  $0 < \text{number of rotatable bonds} < 9$ .

**Table S1:** ADME (Absorption, Distribution, Metabolism, and Excretion) properties were calculated for all compounds using the QikProp module of Schrödinger.

| S. No. | QPlogPC <sub>16</sub> | QPlogPo <sub>ct</sub> | QPlogP <sub>w</sub> | QPlogPo/ <sub>w</sub> | QPlog <sub>S</sub> | CIQPlog <sub>S</sub> | QPlogHER <sub>G</sub> | QPPCac <sub>o</sub> | QPlogB <sub>B</sub> | QPPMDC <sub>K</sub> | QPlogK <sub>p</sub> | QPlogKh <sub>sa</sub> | %HO <sub>A</sub> | PSA     | RO <sub>3</sub> |
|--------|-----------------------|-----------------------|---------------------|-----------------------|--------------------|----------------------|-----------------------|---------------------|---------------------|---------------------|---------------------|-----------------------|------------------|---------|-----------------|
| SA1    | 14.976                | 23.164                | 14.353              | 1.783                 | -2.36              | -4.896               | -7.005                | 42.409              | -1.25               | 18.011              | -5.095              | -0.454                | 66.512           | 132.54  | 0               |
| SA2    | 16.172                | 23.477                | 14.052              | 3.416                 | -4.097             | -5.707               | -8.007                | 187.578             | -0.595              | 90.346              | -3.525              | 0.095                 | 87.633           | 94.159  | 0               |
| SA3    | 15.288                | 22.933                | 14.518              | 1.6                   | -2.791             | -4.896               | -7.213                | 18.92               | -1.723              | 7.574               | -5.849              | -0.412                | 59.167           | 139.171 | 1               |
| SA4    | 14.64                 | 22.105                | 12.824              | 2.781                 | -3.539             | -5.204               | -6.954                | 147.329             | -0.394              | 286.431             | -4.355              | -0.252                | 82.035           | 95.259  | 0               |
| SA5    | 14.015                | 21.461                | 13.043              | 2.268                 | -2.745             | -4.472               | -6.999                | 147.221             | -0.534              | 117.474             | -4.198              | -0.383                | 79.029           | 95.351  | 0               |
| SA6    | 14.17                 | 22.152                | 14.832              | 1.319                 | -1.876             | -3.729               | -7.108                | 85.755              | -0.886              | 38.781              | -4.579              | -0.746                | 69.272           | 107.307 | 0               |
| SA7    | 15.218                | 23.054                | 15.003              | 1.512                 | -3.512             | -5.239               | -7.365                | 33.14               | -1.466              | 13.874              | -5.288              | -0.568                | 63.009           | 119.999 | 0               |

QPlogPo/w (octanol/water partition coefficient); Plog S (aqueous solubility); QPlog Kh<sub>sa</sub> (Binding to human serum albumin); QPPCaco (Apparent Caco cell permeability); Brain/blood partition coefficient (QPlogBB); Percentage human oral absorption (%HOA); Polar surface area (PSA)
